# Supplementary material
Source: PubMed Central journal article supplement (PMC7378457)
Supplement: bloodBLD2020006520-suppl1.pdf [file bloodBLD2020006520-suppl1.pdf]

**COVID and Coagulation: Bleeding and Thrombotic Manifestations of SARS-CoV2 Infection**  
**Supplemental Material**

**Supplemental Figure 1.** Flow diagram of patients included in study.

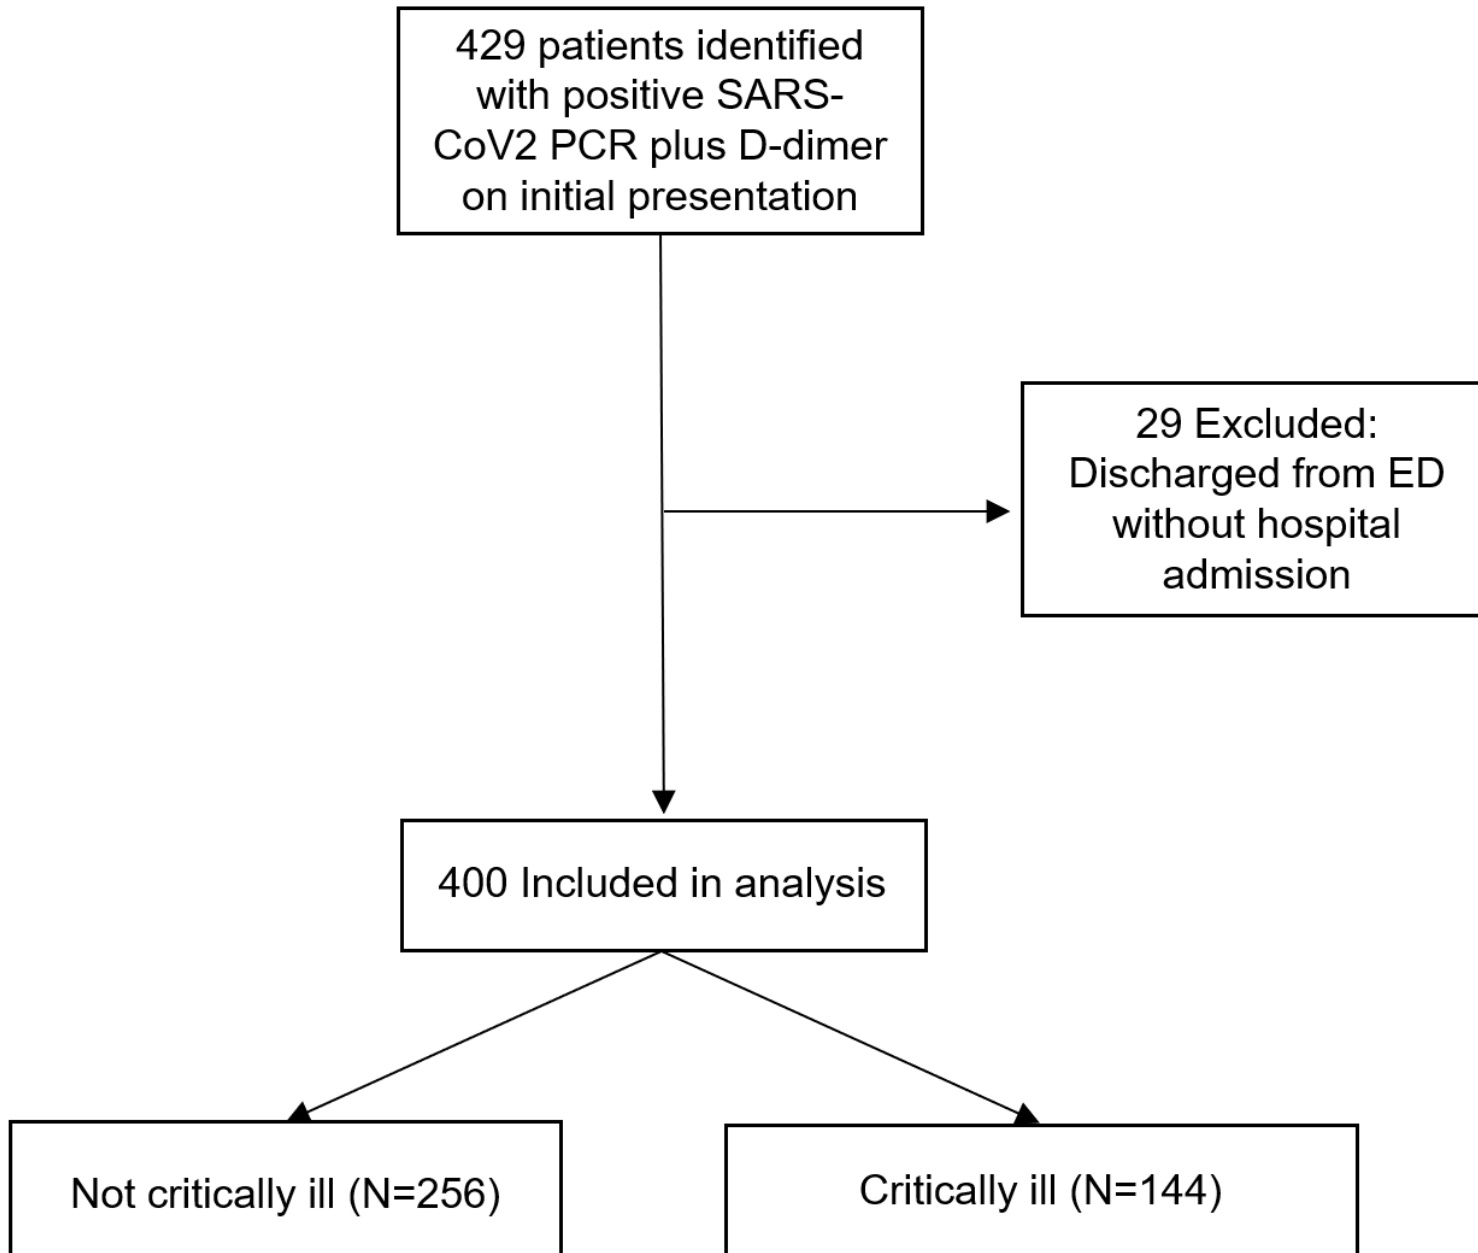

**Supplemental Table 1.** Standard prophylactic anticoagulation agents and dosing incorporating institutional guidelines at all five hospitals during the study period. Guidelines were developed at the institutional level (and are not published guidelines from a professional society or group). Treating clinicians may have deviated from these institutional guidelines as they felt clinically indicated. SC, subcutaneous. Enoxaparin is usually selected except in patients with significant renal impairment (CrCl <30), for whom unfractionated heparin is generally chosen. For the purposes of prophylactic anticoagulation dosing, obesity was defined as BMI  $\geq$ 40 or weight >120 kg for 3 institutions and weight >150 kg for 2 institutions.

| Location                 | Medical Floor                                                                            | Medical Floor (obese)                                                                               | ICU                                                                                      | ICU (obese)                                                                                         |
|--------------------------|------------------------------------------------------------------------------------------|-----------------------------------------------------------------------------------------------------|------------------------------------------------------------------------------------------|-----------------------------------------------------------------------------------------------------|
| <b>Agents and Dosing</b> | Enoxaparin 40 mg SC daily<br><br>OR<br>Unfractionated heparin 5000 U SC every 8-12 hours | Enoxaparin 40 mg SC every 12 hours<br><br>OR<br>Unfractionated heparin 5000-7500 U SC every 8 hours | Enoxaparin 40 mg SC daily<br><br>OR<br>Unfractionated heparin 5000 U SC every 8-12 hours | Enoxaparin 40 mg SC every 12 hours<br><br>OR<br>Unfractionated heparin 5000-7500 U SC every 8 hours |

**Supplemental Table 2.** Assays and assay manufacturers for each laboratory parameter by hospital. Reference ranges for each test were identical or very similar at each institution, and are summarized appropriately by the following: D-dimer, <500 ng/mL; prothrombin time, 11.5-14.5 sec; international normalized ratio, 0.9-1.1; partial thromboplastin time, 22.0-36.0 sec; fibrinogen, 150-450 mg/dL; platelet count, 150-450×10<sup>9</sup>/L; C-reactive protein, <8.0 mg/L; erythrocyte sedimentation rate, <13 mm/h (men) and <20 mm/h (women); ferritin, 20-300 µg/L (men) and 10-200 µg/L (women); procalcitonin, <0.10 ng/mL; high-sensitivity cardiac troponin, <14 ng/L (men) and <9 ng/L (women).

| Laboratory Test                                                 | Assay, Manufacturer                                                                                                                                                                                                                                           |
|-----------------------------------------------------------------|---------------------------------------------------------------------------------------------------------------------------------------------------------------------------------------------------------------------------------------------------------------|
| PT/INR, aPTT, fibrinogen                                        | Performed using reagents from Stago (Neoplastine CI Plus, PTT-A, and Sta-fibrinogen, respectively) except for one laboratory that used reagents from Instrumentation Laboratory (HemosIL RecombiPlasTin 2G, SynthASil, Q.F.A. Bovine Thrombin, respectively). |
| D-dimer                                                         | All tests reported results in FEU with a reference range of <500 ng/mL FEU. Performed using Vidas (bioMerieux) in two laboratories, Sta-Liatest (Stago) in two laboratories, and HS 500 (Instrumentation Laboratory) in one laboratory.                       |
| ESR                                                             | Performed using iSed (Alcor) except for one laboratory that used Inversa (Mechatronics).                                                                                                                                                                      |
| Platelet counts                                                 | Obtained using Sysmex analyzers in all laboratories.                                                                                                                                                                                                          |
| CRP, procalcitonin, ferritin, high-sensitivity cardiac troponin | Performed with Cobas (Roche) in all laboratories.                                                                                                                                                                                                             |

**Supplemental Table 3.** Pre-existing clinical conditions imparting a high risk for COVID-19 included in multivariable logistic models in addition to age, sex, BMI, baseline anticoagulation intensity, and residence in a long-term care facility.

| Risk Factor                               | Included Conditions                                                                                                                                                                      |
|-------------------------------------------|------------------------------------------------------------------------------------------------------------------------------------------------------------------------------------------|
| Chronic lung disease                      | Chronic obstructive pulmonary disease, moderate-to-severe asthma, restrictive or fibrotic lung disease, cystic fibrosis, lung cancer                                                     |
| Diabetes mellitus                         | Type 1, type 2, or gestational diabetes mellitus                                                                                                                                         |
| Cardiovascular disease                    | Heart failure, coronary artery disease, congenital heart disease, cardiomyopathy, pulmonary hypertension, systemic hypertension (stage 2 or worse)                                       |
| Chronic kidney disease requiring dialysis | Patients on hemodialysis or peritoneal dialysis                                                                                                                                          |
| Immunocompromise                          | HIV/AIDS or other immunodeficiencies, use of immunosuppressive medications, receipt of cancer chemotherapy within 4 weeks of presentation                                                |
| Chronic liver disease                     | Pathologic (fibrosis or cirrhosis) or clinical diagnosis of chronic liver disease including alcoholic liver disease, non-alcoholic fatty liver disease, and other chronic liver diseases |

**Supplemental Table 4.** Sensitivity analysis for predictors of thrombosis (see Figure 1 in primary manuscript for full analysis) analyzing those parameters (D-dimer, platelet count, C-reactive protein, and erythrocyte sedimentation rate) predictive of thrombosis in the full analysis (that included all thrombotic complications). Cases in sensitivity analysis included only radiographically-confirmed VTE or arterial thrombosis and myocardial infarction.

| <b>Marker Initial Value</b>           | <b>Unadjusted OR<br/>(95% CI)</b> | <b>P value</b> | <b>Adjusted OR<br/>(95% CI)</b> | <b>P value</b> |
|---------------------------------------|-----------------------------------|----------------|---------------------------------|----------------|
| <b>D-dimer</b>                        |                                   |                |                                 |                |
| ≤1000                                 | 1 (reference)                     | --             | 1 (reference)                   | --             |
| 1001-2500                             | 1.75 (0.69-4.42)                  | 0.24           | 1.78 (0.65-4.84)                | 0.26           |
| >2500                                 | 4.40 (1.60-12.08)                 | 0.004          | 5.28 (1.74-15.96)               | 0.003          |
| <b>Platelet count</b>                 |                                   |                |                                 |                |
| ≤450                                  | 1 (reference)                     | --             | 1 (reference)                   | --             |
| >450                                  | 2.53 (0.89-7.20)                  | 0.081          | 3.29 (1.03-10.57)               | 0.045          |
| <b>C-reactive protein</b>             |                                   |                |                                 |                |
| ≤100                                  | 1 (reference)                     | --             | 1 (reference)                   | --             |
| >100                                  | 3.42 (1.47-7.95)                  | 0.004          | 3.04 (1.24-7.47)                | 0.015          |
| <b>Erythrocyte sedimentation rate</b> |                                   |                |                                 |                |
| ≤40                                   | 1 (reference)                     | --             | 1 (reference)                   | --             |
| >40                                   | 1.82 (0.89-4.84)                  | 0.23           | 1.66 (0.59-4.65)                | 0.34           |

**Supplemental Table 5.** Sensitivity analysis for predictors of bleeding (see Figure 2 in primary manuscript for full analysis) analyzing those parameters (D-dimer and platelet count) predictive of bleeding in the full analysis (that included all bleeding events). Cases in sensitivity analysis included only major bleeds (WHO grade 3 or 4).

| <b>Marker Initial Value</b> | <b>Unadjusted OR<br/>(95% CI)</b> | <b>P value</b> | <b>Adjusted OR<br/>(95% CI)</b> | <b>P value</b> |
|-----------------------------|-----------------------------------|----------------|---------------------------------|----------------|
| <b>D-dimer</b>              |                                   |                |                                 |                |
| <b>≤1000</b>                | 1 (reference)                     | --             | 1 (reference)                   | --             |
| <b>1001-2500</b>            | 1.53 (0.31-7.72)                  | 0.60           | 1.40 (0.25-7.74)                | 0.70           |
| <b>&gt;2500</b>             | 4.54 (0.89-23.23)                 | 0.069          | 4.73 (0.85-26.21)               | 0.076          |
| <b>Platelet count</b>       |                                   |                |                                 |                |
| <b>&lt;150</b>              | 4.07 (1.07-15.46)                 | 0.040          | 4.42 (1.09-17.91)               | 0.037          |
| <b>≥150</b>                 | 1 (reference)                     | --             | 1 (reference)                   | --             |

**Supplemental Table 6.** 95% confidence intervals for Spearman correlation coefficients for correlation matrix demonstrating strength of correlation between D-dimer and evaluated inflammatory parameters (Figure 5 in primary manuscript). All correlations were statistically significant ( $P<0.0001$ ).

|                      | <b>D-Dimer</b> | <b>CRP</b>   | <b>ESR</b>   | <b>Ferritin</b> | <b>Procalcitonin</b> |
|----------------------|----------------|--------------|--------------|-----------------|----------------------|
| <b>D-Dimer</b>       |                | 0.47 to 0.62 | 0.33 to 0.52 | 0.25 to 0.43    | 0.38 to 0.55         |
| <b>CRP</b>           | 0.47 to 0.62   |              | 0.60 to 0.73 | 0.32 to 0.50    | 0.49 to 0.63         |
| <b>ESR</b>           | 0.33 to 0.52   | 0.60 to 0.73 |              | 0.20 to 0.42    | 0.17 to 0.39         |
| <b>Ferritin</b>      | 0.25 to 0.43   | 0.32 to 0.50 | 0.20 to 0.42 |                 | 0.33 to 0.51         |
| <b>Procalcitonin</b> | 0.38 to 0.55   | 0.49 to 0.63 | 0.17 to 0.39 | 0.33 to 0.51    |                      |
